# Supplementary material for: piR-39980 mediates doxorubicin resistance in fibrosarcoma by regulating drug accumulation and DNA repair
Source: PubMed Central journal article supplement (PMC8605029; doi:10.1038/s42003-021-02844-1), 2021-11-19
Supplement: 42003_2021_2844_MOESM2_ESM.pdf [file 42003_2021_2844_MOESM2_ESM.pdf]

## **SUPPLEMENTARY INFORMATION**

### **piR-39980 mediates doxorubicin resistance in fibrosarcoma by regulating drug accumulation and DNA repair**

**Basudeb Das<sup>1</sup>, Neha Jain<sup>1</sup>, and Bibekanand Mallick<sup>1,\*</sup>**

<sup>1</sup>RNAi and Functional Genomics Lab., Department of Life Science, National Institute of Technology  
Rourkela, Rourkela-769008, Odisha, India

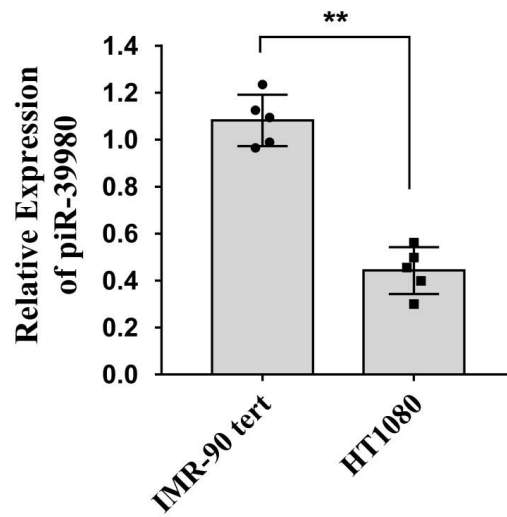

**Supplementary Figure 1:** Expression of piR-39980 in HT1080 cells compared to IMR90 cells. Bars, mean  $\pm$  SEM;  $n = 5$  independent experiments;  $**P < 0.01$ ,  $t$  test.

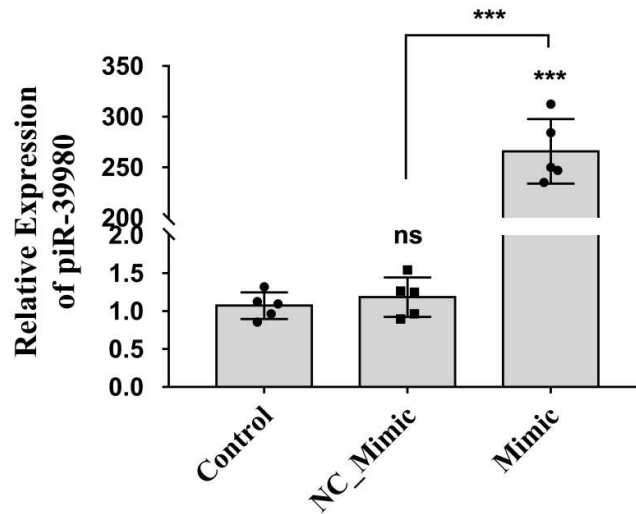

**Supplementary Figure 2:** Relative expression of piR-39980 in HT1080 cells transfected with 20 nM piR-39980 mimics compared with untransfected control and NC\_Mimic. Bars, mean  $\pm$  SEM;  $n = 5$  independent experiments; ns = non-significant,  $***P < 0.001$ , Tukey's multiple comparisons test.

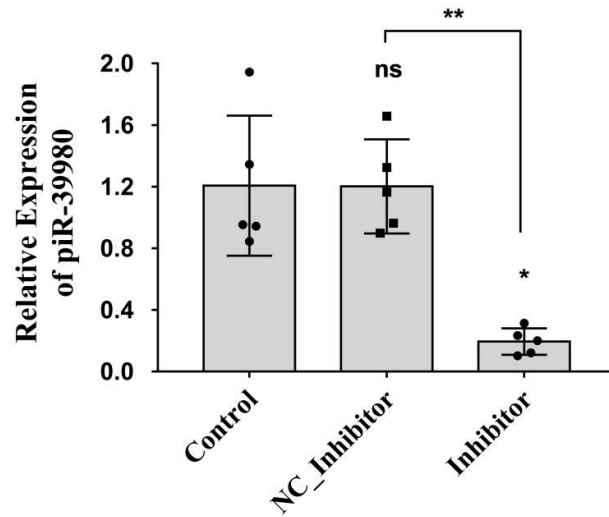

**Supplementary Figure 3:** Relative expression of piR-39980 in HT1080 cells transfected with 20 nM piR-39980 inhibitors compared with untransfected control and NC\_Inhibitor. Bars, mean ± SEM;  $n = 5$  independent experiments; ns = non-significant,  $*P < 0.05$ ,  $**P < 0.01$ , Tukey's multiple comparisons test.

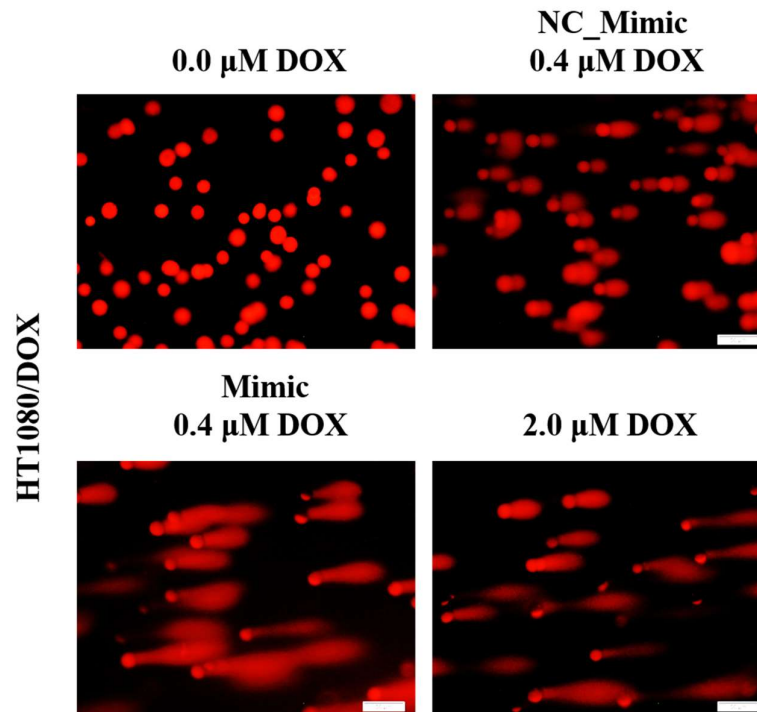

**Supplementary Figure 4:** Effect of piR-39980 on DOX-induced DNA damage determined by comet assay.

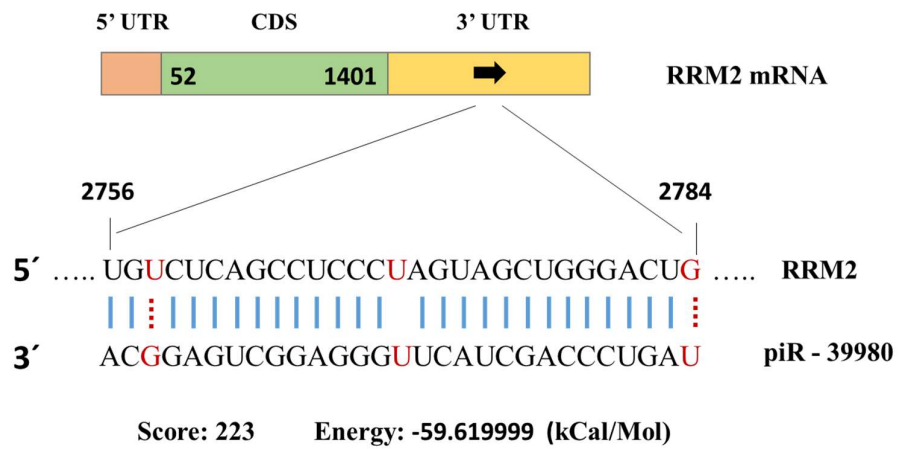

**Supplementary Figure 5:** The target binding site of piR-39980 within 3'UTR of RRM2

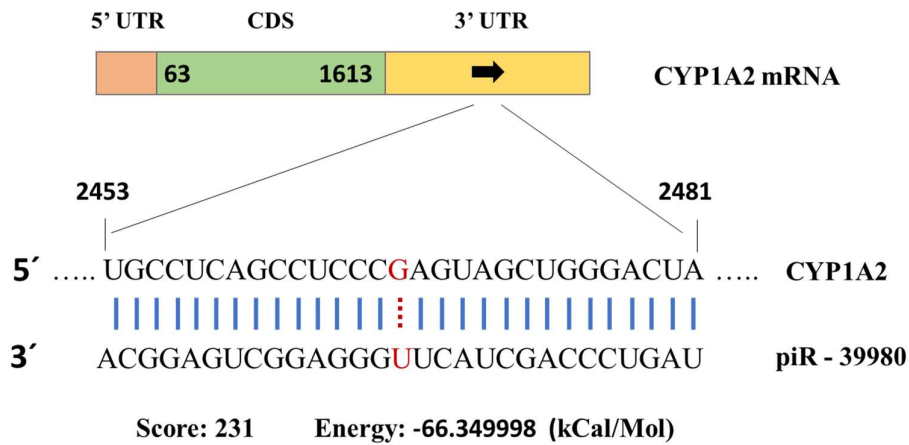

**Supplementary Figure 6:** The target binding site of piR-39980 within 3'UTR of CYP1A2

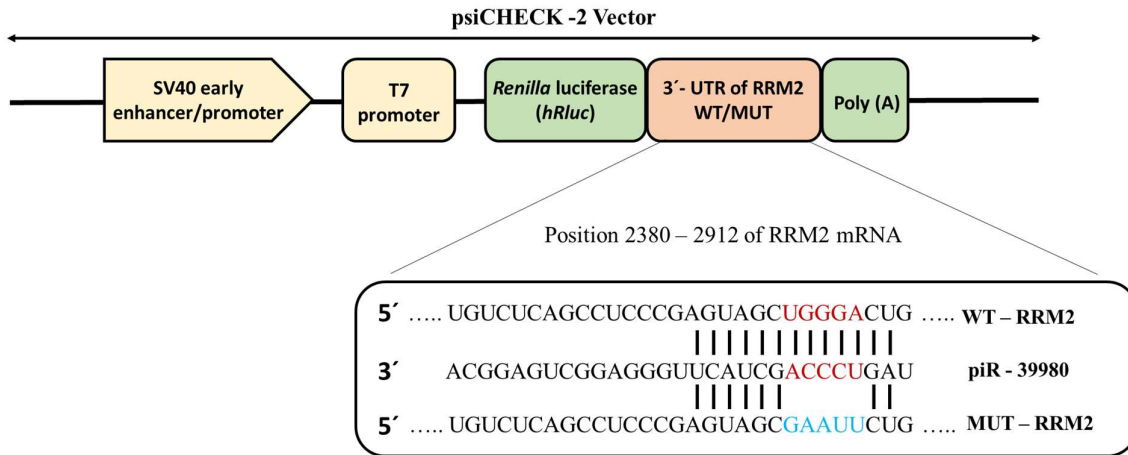

**Supplementary Figure 7:** Dual-luciferase reporter assay construct of RRM2

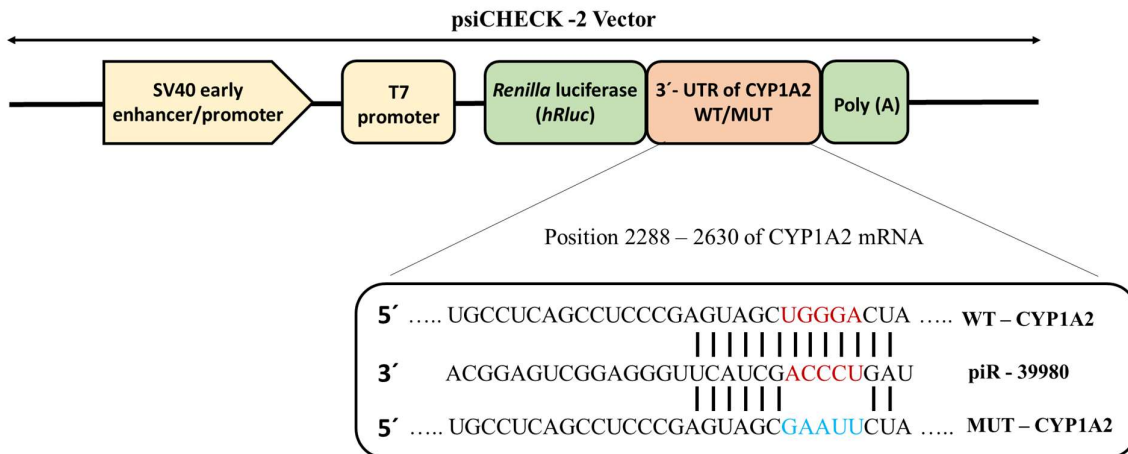

**Supplementary Figure 8:** Dual-luciferase reporter assay construct of CYP1A2

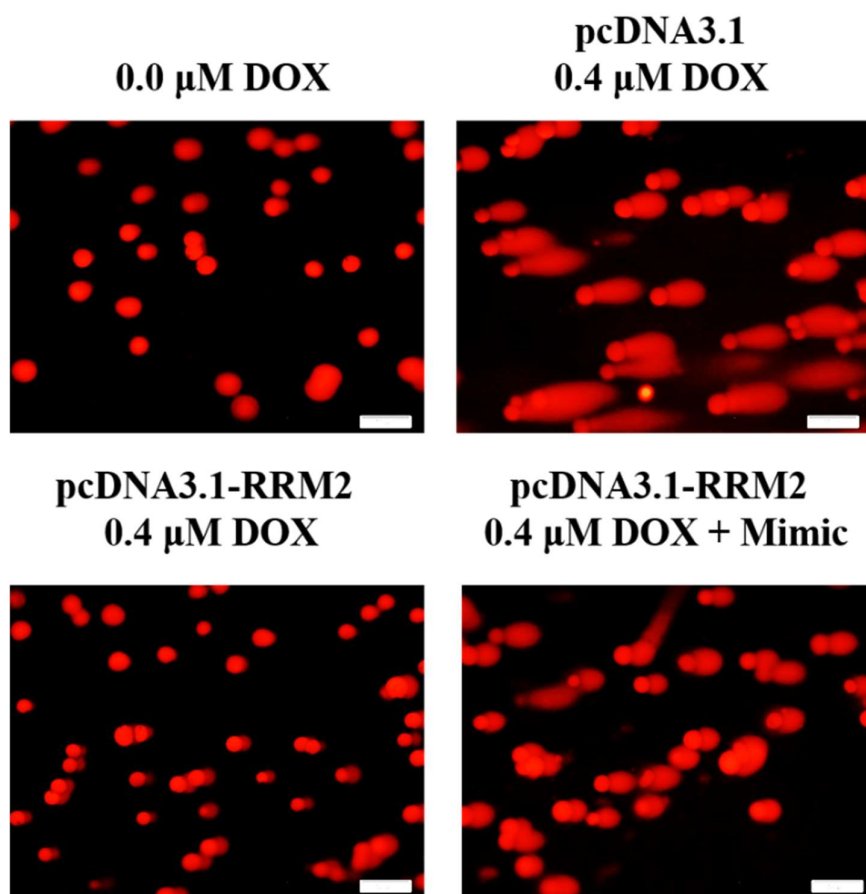

**Supplementary Figure 9:** Effect of piR-39980 on DOX-induced DNA damage determined by comet assay.

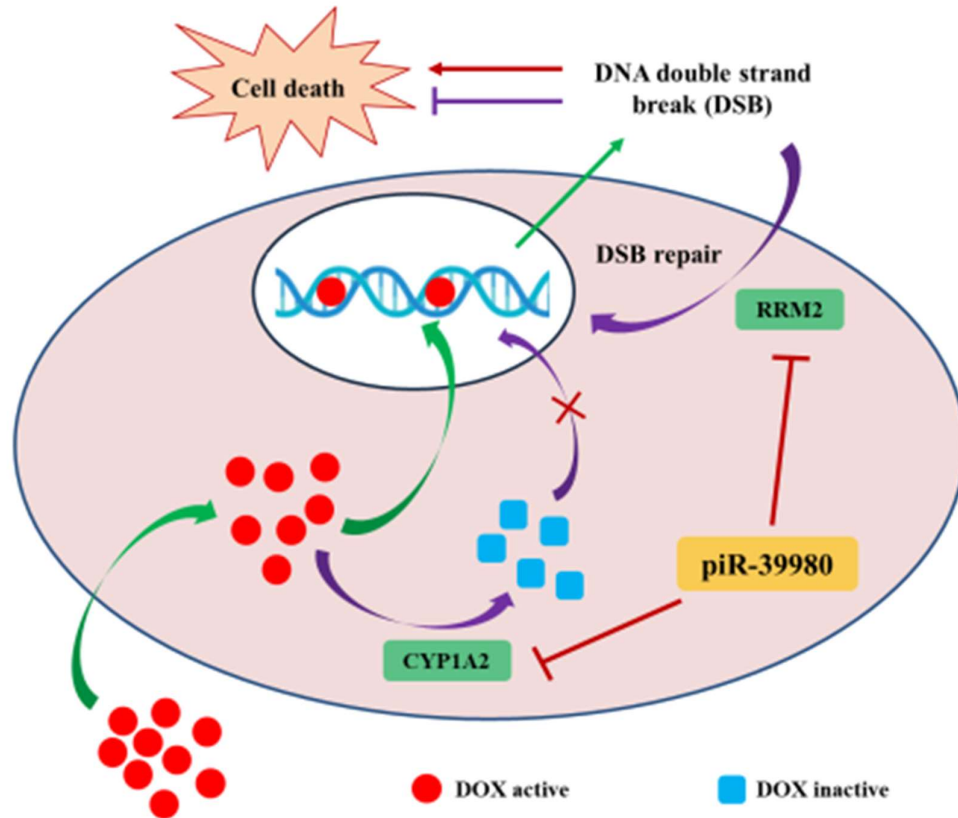

**Supplementary Figure 10: A model showing molecular mechanisms of piR-39980 inducing DOX sensitivity of fibrosarcoma cells through its targets, RRM2 and CYP1A2.**

In general, the drug-metabolizing enzyme CYP1A2 inactivates DOX within cells, whereas RRM2 induces a repair mechanism and rescues DOX-mediated DNA damage, both of which confer resistance. However, piR-39980 boosts cell death by increasing DOX sensitivity by repressing these two genes, RRM2 and CYP1A2, two targets of this piRNA.

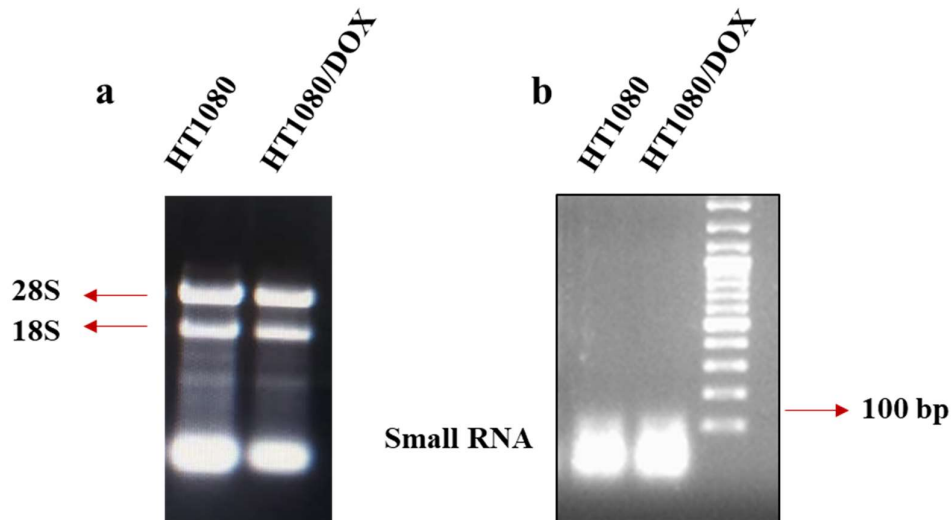

**Supplementary Figure 11: Agarose gel electrophoresis showing the integrity of RNA isolated from the parental HT1080 and HT1080/DOX cells. a** Total RNA was isolated using HiPurA™ Total RNA Miniprep Purification Kit (Himedia). **b** Small RNA was isolated using *mirVana*™ miRNA Isolation Kit (Invitrogen).

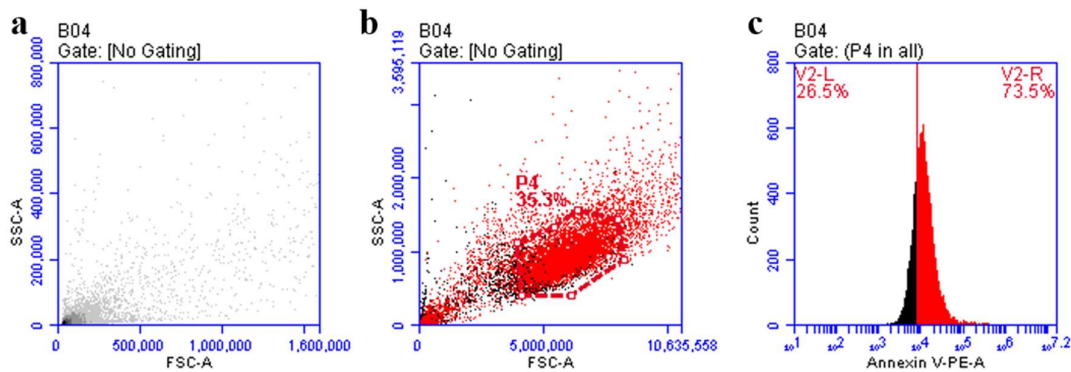

**Supplementary Figure 12: Flow cytometry gating strategy.** Representative image of Fig. 5c. Data were analyzed using BD Accuri™ C6 Plus flow cytometry. First, we created a dot plot of the data displaying SSC vs FSC. We placed a gate around the cell in the dense area. The debris was visible in the lower-left corner of the plot, which was excluded by the gate. FSC/SSC gate showed 20-40% cell populations that vary from sample to sample. Then, we created a histogram and plotted the gated data. The histogram showed cell count vs annexin V-PE stain. We made a boundary at 10<sup>4</sup> on X-axis. The left quadrant shows unstained cells, and the right quadrant shows annexin V-PE-stained cells.



**Supplementary Table 1:** Sequences of piR-39980 Mimic, Inhibitor, and NC\_Inhibitor

|                                                                                                    |
|----------------------------------------------------------------------------------------------------|
| <b>piR-39980 mimic (5'-3'):</b><br>rUrArGrUrCrCrCrArGrCrUrArCrUrUrGrGrGrArGrGrCrUrGrArGrGrCmA      |
| <b>piR-39980 inhibitor (5'-3'):</b><br>mC/ZEN/mAmGmCmCmUmCmCmCmAmAmGmUmAmGmCmUmGmGmGmAmCmUmA/3ZEN/ |
| <b>NC_Inhibitor (5'-3'):</b><br>mG/ZEN/mCmGmAmCmUmAmUmAmCmGmCmGmCmAmAmUmAmUmGmG/3ZEN/              |

**Supplementary Table 2:** List of primers and their sequences used in this study

| <b>piRNA/Genes<br/>(GenBank ID)</b>     |   | <b>Primer sequence (5'-3')</b>                         |
|-----------------------------------------|---|--------------------------------------------------------|
| piR-39980<br>(DQ601914.1)               | F | TAGTCCCAGCTACTTGGGAGG                                  |
|                                         | R | Universal reverse primer (Provided by Qiagen with kit) |
| U6<br>(NR_004394.1)                     | F | CTCGCTTCGGCAGCACATATACT                                |
|                                         | R | ACGCTTCACGAATTTGCGTGTC                                 |
| RRM2_qRT-PCR<br>(NM_001165931.1)        | F | ACTATGCTCTCCCTCCGTGT                                   |
|                                         | R | CGGTCCAAAAGGAAGCCTCT                                   |
| CYP1A2_qRT-PCR<br>(NM_000761.5)         | F | CTGGGCACTTCGACCCTTAC                                   |
|                                         | R | TCTCATCGCTACTCTCAGGGA                                  |
| RRM2_luciferase<br>(NM_001165931.1)     | F | GCGGCACTCGAGACTTTAGTAGGAAACCATGAGC                     |
|                                         | R | ATAGCGGCCGCTGTCTCAGCTTTCTTCTCCC                        |
| CYP1A2_luciferase<br>(NM_000761.5)      | F | GACGCTCGAGAAGTGTCGAATGACTTCTAGTGT                      |
|                                         | R | ATAGCGGCCGCGGTGGTTCATACCTGTTAATC                       |
| RRM2_overexpression<br>(NM_001165931.1) | F | ACTCTCGAGATGGGAAGGGTCGGAGGCA                           |
|                                         | R | GTCGGATCCCCTGATTCCAACCTCCGCC                           |
| CYP1A2_overexpression<br>(NM_000761.5)  | F | ACGCTCGAGATGGCATTGTCCCAGTCTGTTC                        |
|                                         | R | GTCGGATCCCCTGACTCCAGCTTAGGAG                           |
| RPL13<br>(NM_000977.4)                  | F | GTTCGGTACCACACGAAGGT                                   |
|                                         | R | TACGGAGACTAGCGAAGGCT                                   |
