# Supplementary material for: piR-39980 mediates doxorubicin resistance in fibrosarcoma by regulating drug accumulation and DNA repair
Source: PubMed Central journal article supplement (PMC8605029; doi:10.1038/s42003-021-02844-1), 2021-11-19
Supplement: 42003_2021_2844_MOESM3_ESM.pdf [file 42003_2021_2844_MOESM3_ESM.pdf]

## Description of Additional Supplementary Files

**File name:** Supplementary Data 1

**Description:** All source data underlying the graphs and charts.
